# Supplementary material for: Cone-like rhodopsin expressed in the all cone retina of the colubrid pine snake as a potential adaptation to diurnality
Source: Oxford University Press journal article supplement (doi:10.1242/jeb.156430), 2017-01-01
Supplement: jeb156430supp.pdf [file jeb156430supp.pdf]

## Supplemental Information

Table S1. Degenerate Primers designed for sequencing opsin genes from genomic DNA

| Opsin | Primer           | Sequence (5'-3')                | Source             |
|-------|------------------|---------------------------------|--------------------|
| RH1   | SquamR1_1F       | AAGGAGTCTGARTCIACICARAARGC      | This paper         |
| RH1   | SquamR1_972R     | GCGGAACTGTCGATTCATRAAIACRTADAT  | This paper         |
| LWS   | DIAPLMF1         | AAGCGTATTYAYTTAYACCRACASCAACAA  | Davis et al., 2009 |
| LWS   | DIAPLMR1         | CATCCTBGACACYTCCYTCTCVGCCTTCTG' | Davis et al., 2009 |
| LWS   | PM_LWS3'GW_877F  | TCTGGCAGCTTCCCTGCCTGCCTTCTT     | This paper         |
| LWS   | PM_LWS3'GW_877FR | GTAATACGACTCACTATAGGGC          | This paper         |
| LWS   | PM_LWS3'GW_865F  | TGCCTTTCACCCTCTGGCAGCTTCCCT     | This paper         |
| LWS   | PM_LWS3'GW_865FR | GTAATACGACTCACTATAGGGC          | This paper         |
| LWS   | PM_LWS3'GW_905F  | GCAAAAAGCGCCACCATTTACAACCCA     | This paper         |
| LWS   | PM_LWS3'GW_905FR | CGGGCTGGTGCAGAACTGTCGATTCAT     | This paper         |
| LWS   | PM_LWS3'GW_936F  | TATACGTCTTCATGAATCGACAGTCCG     | This paper         |
| LWS   | PM_LWS3'GW_936FR | ACTATAGGGCACGCGTGGT             | This paper         |
| LWS   | PM_LWS5'GW_212R  | GTAATACGACTCACTATAGGGC          | This paper         |
| LWS   | PM_LWS5'GW_212RR | TTGGCTGTGGCCACCAATACCAAACCA     | This paper         |
| LWS   | PM_LWS5'GW_210R  | GTAATACGACTCACTATAGGGC          | This paper         |
| LWS   | PM_LWS5'GW_210RR | GGCTGTGGCCACCAATACCAAACCATT     | This paper         |
| LWS   | PM_LWS5'GW_90R   | GTAATACGACTCACTATAGGGC          | This paper         |
| LWS   | PM_LWS5'GW_90RR  | AGGGTCACGGGTATTGTTGCTGTTGGT     | This paper         |
| LWS   | PM_LWS5'GW_89R   | GTAATACGACTCACTATAGGGC          | This paper         |
| LWS   | PM_LWS5'GW_89RR  | GGGTCACGGGTATTGTTGCTGTTGGTG     | This paper         |
| SWS1  | SquamS1_84F      | TCCTCGCCTTCGAACGATATRISGTSATCT  | This paper         |
| SWS1  | SquamS1_857R     | CATCATCCACTTTYTTSCCRAASAGCTGCA  | This paper         |
| SWS1  | PM_S13'GW_478F   | ATGTACATGGTGAACAACCCTCAGCAC     | This paper         |
| SWS1  | PM_S13'GW_478FR  | GTAATACGACTCACTATAGGGC          | This paper         |
| SWS1  | PM_S13'GW_477F   | CATGTACATGGTGAACAACCCTCAGCA     | This paper         |
| SWS1  | PM_S13'GW_477FR  | GTAATACGACTCACTATAGGGC          | This paper         |
| SWS1  | PM_S13'GW_519F   | CTTGGTCACCATCCCTGCCTTCTTC       | This paper         |
| SWS1  | PM_S13'GW_519FR  | GTAATACGACTCACTATAGGGC          | This paper         |
| SWS1  | PM_S13'GW_522F   | GGTCACCATCCCTGCCTTCTTCTCCAA     | This paper         |
| SWS1  | PM_S13'GW_522FR  | ACTATAGGGCACGCGTGGT             | This paper         |
| SWS1  | PM_S15'GW_128R   | GTAATACGACTCACTATAGGGC          | This paper         |
| SWS1  | PM_S15'GW_128RR  | ACTACCACAGCATGTTTGGAGTGAAAA     | This paper         |
| SWS1  | PM_S15'GW_120R   | GTAATACGACTCACTATAGGGC          | This paper         |
| SWS1  | PM_S15'GW_120RR  | AGCATGTTTGGAGTGAAACGGAAGT       | This paper         |
| SWS1  | PM_S15'GW_99R    | ACTATAGGGCACGCGTGGT             | This paper         |
| SWS1  | PM_S15'GW_99RR   | GAAGTTCCCCAGCGCTTGCAGATCAC      | This paper         |
| SWS1  | PM_S15'GW_95R    | ACTATAGGGCACGCGTGGT             | This paper         |
| SWS1  | PM_S15'GW_95RR   | TTCCCAGCGGCTTGCAGATCACGATA      | This paper         |

**Table S2.** List of sequences used in the phylogenetic analyses of opsin genes

|                                     | RH1          | LWS                    | SWS          |
|-------------------------------------|--------------|------------------------|--------------|
| <i>Amerotyphlops brongersmianus</i> | KR336737     | -----                  | -----        |
| <i>Amphisbaena alba</i>             | KR336729     | KR336705               | KR336720     |
| <i>Amphisbaena infraorbitale</i>    | KR336730     | KR336704               | KR336719     |
| <i>Anilius scytale</i>              | KR336736     | -----                  | -----        |
| <i>Anolis carolinensis</i>          | NM_001291387 | U08131<br>XM_008103916 | AF134194     |
| <i>Arizona elegans</i>              | KU324006     | KU323986               | KU323997     |
| <i>Atractus flammigerus</i>         | KR336740     | KR336712               | KR336726     |
| <i>Bachia flavescens</i>            | KR336731     | KR336703               | KR336715     |
| <i>Epictia collaris</i>             | KR336735     | -----                  | -----        |
| <i>Feylinia</i>                     | KR336742     | KR336714               | KR336717     |
| <i>Gekko gekko</i>                  | -----        | M92036                 | AY024356     |
| <i>Gekko japonicus</i>              | -----        | XM_015415465           | XM_015427348 |
| <i>Hydrophis peronii</i>            | KU324001     | KU323990               | KU323991     |
| <i>Hypsigena jani</i>               | KU324007     | KU323988               | KU323998     |
| <i>Iguana iguana</i>                | -----        | -----                  | AB626972     |
| <i>Lampropeltis californiae</i>     | KU324004     | KU323987               | KU323992     |
| <i>Liotyphlops beui</i>             | KR336734     | -----                  | -----        |
| <i>Melanoseps occidentalis</i>      | KR336743     | KR336713               | KR336718     |
| <i>Natrix maura</i>                 | KU324002     | KU323982               | KU323993     |
| <i>Notechis scutatus</i>            | KU324000     | KU323989               | KU323999     |
| <i>Ophiodes striatus</i>            | KR336732     | KR336708               | KR336716     |
| <i>Phelsuma madagascariensis</i>    | -----        | AF074043               | AF074045     |
| <i>Phyllorhynchus decurtatus</i>    | -----        | KU323985               | KU323996     |
| <i>Pituophis melanoleucus</i>       | xxxxxx       | xxxxxx                 | xxxxxx       |
| <i>Polemon collaris</i>             | KR336739     | KR336710               | KR336724     |
| <i>Protobothrops mucrosquamatus</i> | XM_015823472 | XM_015812260           | XM_015825841 |
| <i>Pseustes poecilonotus</i>        | KR336741     | KR336711               | KR336725     |
| <i>Python bivittatus</i>            | XM_007423262 | XM_007420519           | XM_007441636 |
| <i>Python regius</i>                | FJ497236     | FJ497238               | FJ497237     |
| <i>Takydromus sexlineatus</i>       | KR336727     | KR336707               | KR336722     |
| <i>Telescopus fallax</i>            | KU324005     | KU323984               | KU323995     |
| <i>Thamnophis proximus</i>          | KU306726     | KU306727               | KU306728     |

|                             |              |              |                         |
|-----------------------------|--------------|--------------|-------------------------|
| <i>Thamnophis sirtalis</i>  | XM_014059138 | XM_014068735 | XM_014075668<br>KU32399 |
| <i>Tropidophis feicki</i>   | KR336738     | KR336709     | KR336723                |
| <i>Typhlophis squamosus</i> | KR336733     | -----        | -----                   |
| <i>Uta stansburiana</i>     | DQ100323     | DQ129869     | DQ100325                |
| <i>Xenopeltis unicolor</i>  | FJ497233     | FJ497235     | FJ497234                |





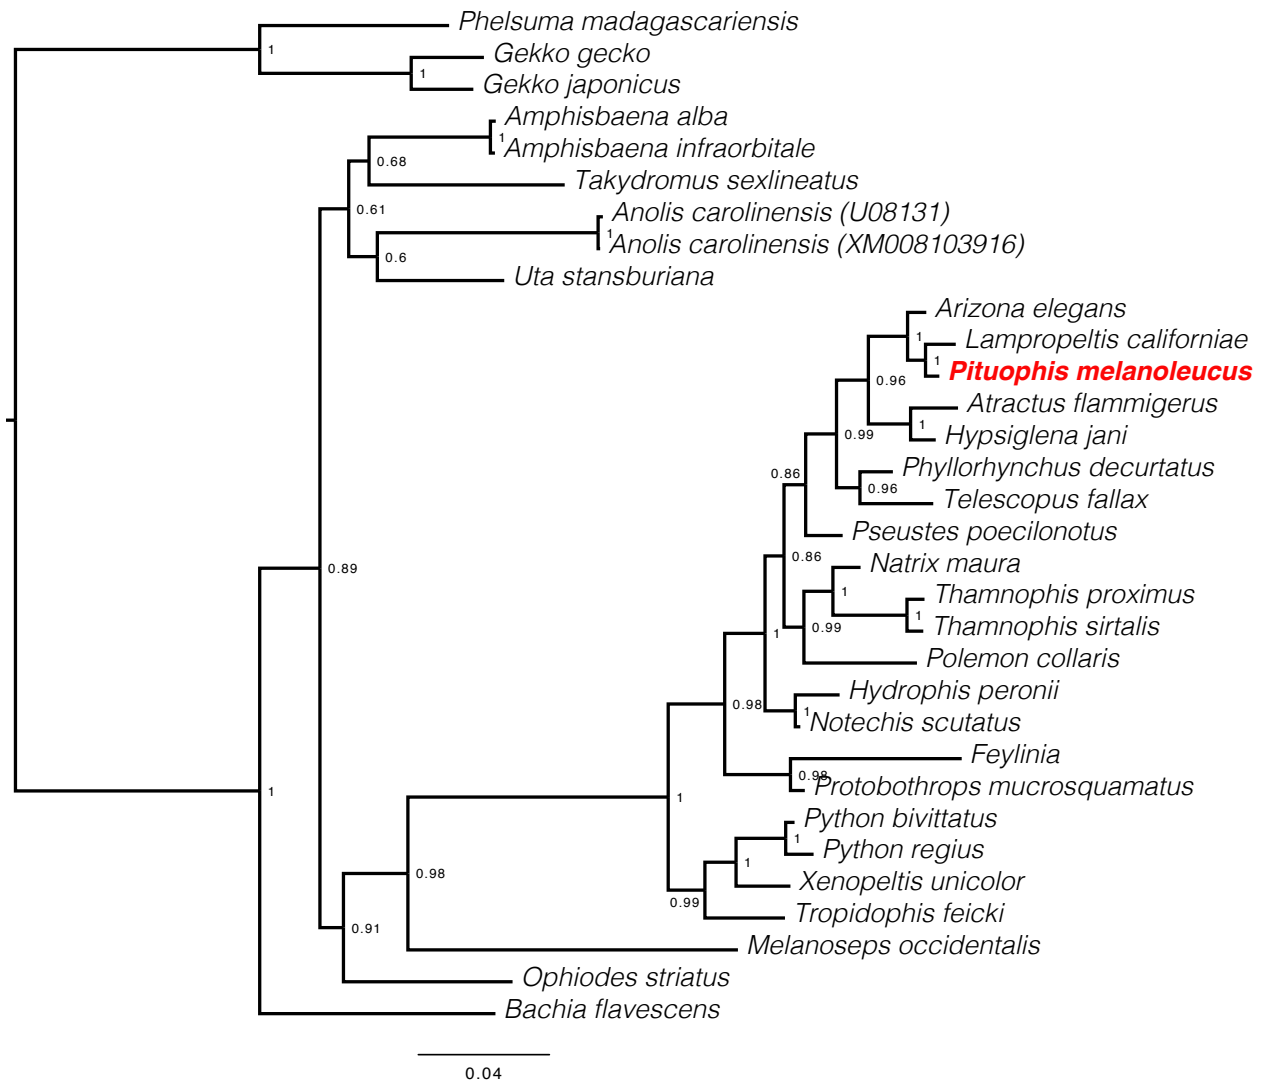

**Figure S3.** LWS gene tree estimated using Bayesian inference illustrating the position of *Pituophis melanoleucus* LWS. Numbers at the nodes are posterior probability percentages.
